# Supplementary material for: Proton pump inhibitors alter the composition of the gut microbiota
Source: Gut. 2015 Dec 30;65(5):749–56. doi: 10.1136/gutjnl-2015-310861 (PMC4853574; doi:10.1136/gutjnl-2015-310861)
Supplement: Web supplement 7 [file gutjnl-2015-310861-s7.xls]

## Sheet: hmp_fam_site_cats.txt
HMP Family	HMP Site Specificity (NA = None)
Root;Other;Other;Other;Other	gut
Root;p__Acidobacteria;c__;o__;f__	NA
Root;p__Acidobacteria;c__Acidobacteria;o__Acidobacteriales;f__	NA
Root;p__Acidobacteria;c__Chloracidobacteria;o__;f__	NA
Root;p__Acidobacteria;c__Holophagae;o__Holophagales;f__Holophagaceae	NA
Root;p__Acidobacteria;c__iii1-8;o__DS-18;f__	NA
Root;p__Acidobacteria;c__Solibacteres;o__Solibacterales;f__Solibacteraceae	NA
Root;p__Actinobacteria;c__Actinobacteria;o__;f__	NA
Root;p__Actinobacteria;c__Actinobacteria;o__Acidimicrobiales;f__	NA
Root;p__Actinobacteria;c__Actinobacteria;o__Acidimicrobiales;f__CL500-29	NA
Root;p__Actinobacteria;c__Actinobacteria;o__Acidimicrobiales;f__EB1017	NA
Root;p__Actinobacteria;c__Actinobacteria;o__Acidimicrobiales;f__Iamiaceae	NA
Root;p__Actinobacteria;c__Actinobacteria;o__Acidimicrobiales;f__Microthrixaceae	NA
Root;p__Actinobacteria;c__Actinobacteria;o__Acidimicrobiales;Other	NA
Root;p__Actinobacteria;c__Actinobacteria;o__Actinomycetales;f__	NA
Root;p__Actinobacteria;c__Actinobacteria;o__Actinomycetales;f__ACK-M1	NA
Root;p__Actinobacteria;c__Actinobacteria;o__Actinomycetales;f__Actinomycetaceae	mouth/throat
Root;p__Actinobacteria;c__Actinobacteria;o__Actinomycetales;f__Actinosynnemataceae	NA
Root;p__Actinobacteria;c__Actinobacteria;o__Actinomycetales;f__Bogoriellaceae	NA
Root;p__Actinobacteria;c__Actinobacteria;o__Actinomycetales;f__Brevibacteriaceae	skin/nose
Root;p__Actinobacteria;c__Actinobacteria;o__Actinomycetales;f__Cellulomonadaceae	NA
Root;p__Actinobacteria;c__Actinobacteria;o__Actinomycetales;f__Corynebacteriaceae	skin/nose
Root;p__Actinobacteria;c__Actinobacteria;o__Actinomycetales;f__Dermabacteraceae	skin/nose
Root;p__Actinobacteria;c__Actinobacteria;o__Actinomycetales;f__Dermacoccaceae	NA
Root;p__Actinobacteria;c__Actinobacteria;o__Actinomycetales;f__Dietziaceae	NA
Root;p__Actinobacteria;c__Actinobacteria;o__Actinomycetales;f__Geodermatophilaceae	NA
Root;p__Actinobacteria;c__Actinobacteria;o__Actinomycetales;f__Gordoniaceae	NA
Root;p__Actinobacteria;c__Actinobacteria;o__Actinomycetales;f__Intrasporangiaceae	skin/nose
Root;p__Actinobacteria;c__Actinobacteria;o__Actinomycetales;f__Jonesiaceae	NA
Root;p__Actinobacteria;c__Actinobacteria;o__Actinomycetales;f__Kineosporiaceae	NA
Root;p__Actinobacteria;c__Actinobacteria;o__Actinomycetales;f__Microbacteriaceae	skin/nose
Root;p__Actinobacteria;c__Actinobacteria;o__Actinomycetales;f__Micrococcaceae	mouth/throat
Root;p__Actinobacteria;c__Actinobacteria;o__Actinomycetales;f__Micromonosporaceae	NA
Root;p__Actinobacteria;c__Actinobacteria;o__Actinomycetales;f__Mycobacteriaceae	skin/nose,vagina
Root;p__Actinobacteria;c__Actinobacteria;o__Actinomycetales;f__Nakamurellaceae	NA
Root;p__Actinobacteria;c__Actinobacteria;o__Actinomycetales;f__Nocardiaceae	NA
Root;p__Actinobacteria;c__Actinobacteria;o__Actinomycetales;f__Nocardioidaceae	skin/nose
Root;p__Actinobacteria;c__Actinobacteria;o__Actinomycetales;f__Promicromonosporaceae	NA
Root;p__Actinobacteria;c__Actinobacteria;o__Actinomycetales;f__Propionibacteriaceae	skin/nose
Root;p__Actinobacteria;c__Actinobacteria;o__Actinomycetales;f__Pseudonocardiaceae	NA
Root;p__Actinobacteria;c__Actinobacteria;o__Actinomycetales;f__Streptomycetaceae	NA
Root;p__Actinobacteria;c__Actinobacteria;o__Actinomycetales;f__Williamsiaceae	NA
Root;p__Actinobacteria;c__Actinobacteria;o__Actinomycetales;f__Yaniellaceae	NA
Root;p__Actinobacteria;c__Actinobacteria;o__Actinomycetales;Other	skin/nose
Root;p__Actinobacteria;c__Actinobacteria;o__Bifidobacteriales;f__	gut
Root;p__Actinobacteria;c__Actinobacteria;o__Bifidobacteriales;f__Bifidobacteriaceae	vagina
Root;p__Actinobacteria;c__Actinobacteria;o__Coriobacteriales;f__	gut
Root;p__Actinobacteria;c__Actinobacteria;o__Coriobacteriales;f__Coriobacteriaceae	mouth/throat
Root;p__Actinobacteria;c__Actinobacteria;o__Coriobacteriales;Other	NA
Root;p__Actinobacteria;c__Actinobacteria;o__koll13;f__	NA
Root;p__Actinobacteria;c__Actinobacteria;o__MC47;f__	NA
Root;p__Actinobacteria;c__Actinobacteria;o__Rubrobacterales;f__Rubrobacteraceae	NA
Root;p__Actinobacteria;c__Actinobacteria;o__Solirubrobacterales;f__	NA
Root;p__Actinobacteria;c__Actinobacteria;o__Solirubrobacterales;f__Patulibacteraceae	NA
Root;p__Actinobacteria;c__Actinobacteria;o__Solirubrobacterales;f__Solirubrobacteraceae	NA
Root;p__Actinobacteria;c__Actinobacteria;o__Solirubrobacterales;Other	NA
Root;p__Armatimonadetes;c__5B-18;o__;f__	NA
Root;p__Armatimonadetes;c__Armatimonadia;o__Armatimonadales;f__Armatimonadaceae	NA
Root;p__Bacteroidetes;c__;o__;f__	NA
Root;p__Bacteroidetes;c__Bacteroidia;o__Bacteroidales;f__	gut
Root;p__Bacteroidetes;c__Bacteroidia;o__Bacteroidales;f__Bacteroidaceae	gut
Root;p__Bacteroidetes;c__Bacteroidia;o__Bacteroidales;f__Porphyromonadaceae	gut,mouth/throat
Root;p__Bacteroidetes;c__Bacteroidia;o__Bacteroidales;f__Prevotellaceae	mouth/throat
Root;p__Bacteroidetes;c__Bacteroidia;o__Bacteroidales;f__Rikenellaceae	gut
Root;p__Bacteroidetes;c__Bacteroidia;o__Bacteroidales;Other	gut
Root;p__Bacteroidetes;c__Flavobacteria;o__;f__	NA
Root;p__Bacteroidetes;c__Flavobacteria;o__Flavobacteriales;f__Blattabacteriaceae	NA
Root;p__Bacteroidetes;c__Flavobacteria;o__Flavobacteriales;f__Cryomorphaceae	NA
Root;p__Bacteroidetes;c__Flavobacteria;o__Flavobacteriales;f__Flavobacteriaceae	mouth/throat
Root;p__Bacteroidetes;c__Flavobacteria;o__Flavobacteriales;Other	NA
Root;p__Bacteroidetes;c__Sphingobacteria;o__Sphingobacteriales;f__	skin/nose
Root;p__Bacteroidetes;c__Sphingobacteria;o__Sphingobacteriales;f__Cyclobacteriaceae	NA
Root;p__Bacteroidetes;c__Sphingobacteria;o__Sphingobacteriales;f__Flammeovirgaceae	NA
Root;p__Bacteroidetes;c__Sphingobacteria;o__Sphingobacteriales;f__Flexibacteraceae	skin/nose
Root;p__Bacteroidetes;c__Sphingobacteria;o__Sphingobacteriales;f__Saprospiraceae	NA
Root;p__Bacteroidetes;c__Sphingobacteria;o__Sphingobacteriales;f__Sphingobacteriaceae	NA
Root;p__Bacteroidetes;c__Sphingobacteria;o__Sphingobacteriales;Other	NA
Root;p__Bacteroidetes;Other;Other;Other	mouth/throat
Root;p__BRC1;c__PRR-11;o__;f__	NA
Root;p__Chlorobi;c__OPB56;o__;f__	NA
Root;p__Chloroflexi;c__Anaerolineae;o__A31;f__S47	NA
Root;p__Chloroflexi;c__Anaerolineae;o__A4b;f__	NA
Root;p__Chloroflexi;c__Anaerolineae;o__Caldilineales;f__	NA
Root;p__Chloroflexi;c__Anaerolineae;o__Caldilineales;f__Caldilineaceae	NA
Root;p__Chloroflexi;c__Anaerolineae;Other;Other	NA
Root;p__Chloroflexi;c__Chloroflexi;Other;Other	NA
Root;p__Chloroflexi;c__SOGA31;o__;f__	NA
Root;p__Chloroflexi;c__Thermomicrobia;o__HN1-15;f__	NA
Root;p__Chloroflexi;Other;Other;Other	NA
Root;p__Cyanobacteria;c__4C0d-2;o__mle1-12;f__	NA
Root;p__Cyanobacteria;c__4C0d-2;o__YS2;f__	NA
Root;p__Cyanobacteria;c__Chloroplast;o__Chlorophyta;f__Chlamydomonadaceae	NA
Root;p__Cyanobacteria;c__Chloroplast;o__Chlorophyta;f__Trebouxiophyceae	NA
Root;p__Cyanobacteria;c__Chloroplast;o__Chlorophyta;Other	NA
Root;p__Cyanobacteria;c__Chloroplast;o__Streptophyta;f__	skin/nose
Root;p__Cyanobacteria;c__Nostocophycideae;o__Nostocales;f__Nostocaceae	NA
Root;p__Cyanobacteria;c__Nostocophycideae;o__Nostocales;f__Rivulariaceae	NA
Root;p__Cyanobacteria;c__Nostocophycideae;o__Nostocales;Other	NA
Root;p__Cyanobacteria;c__Oscillatoriophycideae;o__;f__	NA
Root;p__Cyanobacteria;c__Oscillatoriophycideae;o__Chroococcales;f__Xenococcaceae	NA
Root;p__Cyanobacteria;c__Oscillatoriophycideae;Other;Other	NA
Root;p__Cyanobacteria;c__Synechococcophycideae;o__Pseudanabaenales;f__Pseudanabaenaceae	NA
Root;p__Cyanobacteria;Other;Other;Other	NA
Root;p__Elusimicrobia;c__Elusimicrobia;o__Elusimicrobiales;f__	NA
Root;p__Firmicutes;c__Bacilli;o__Bacillales;f__Alicyclobacillaceae	skin/nose
Root;p__Firmicutes;c__Bacilli;o__Bacillales;f__Bacillaceae	skin/nose
Root;p__Firmicutes;c__Bacilli;o__Bacillales;f__Listeriaceae	NA
Root;p__Firmicutes;c__Bacilli;o__Bacillales;f__Paenibacillaceae	NA
Root;p__Firmicutes;c__Bacilli;o__Bacillales;f__Planococcaceae	NA
Root;p__Firmicutes;c__Bacilli;o__Bacillales;f__Staphylococcaceae	skin/nose
Root;p__Firmicutes;c__Bacilli;o__Bacillales;f__Thermoactinomycetaceae	NA
Root;p__Firmicutes;c__Bacilli;o__Bacillales;Other	skin/nose
Root;p__Firmicutes;c__Bacilli;o__Exiguobacterales;f__Exiguobacteraceae	NA
Root;p__Firmicutes;c__Bacilli;o__Gemellales;f__Gemellaceae	mouth/throat
Root;p__Firmicutes;c__Bacilli;o__Lactobacillales;f__Aerococcaceae	mouth/throat
Root;p__Firmicutes;c__Bacilli;o__Lactobacillales;f__Carnobacteriaceae	mouth/throat
Root;p__Firmicutes;c__Bacilli;o__Lactobacillales;f__Enterococcaceae	NA
Root;p__Firmicutes;c__Bacilli;o__Lactobacillales;f__Lactobacillaceae	vagina
Root;p__Firmicutes;c__Bacilli;o__Lactobacillales;f__Leuconostocaceae	NA
Root;p__Firmicutes;c__Bacilli;o__Lactobacillales;f__Streptococcaceae	mouth/throat
Root;p__Firmicutes;c__Bacilli;o__Lactobacillales;Other	vagina
Root;p__Firmicutes;c__Bacilli;o__Turicibacterales;f__Turicibacteraceae	gut
Root;p__Firmicutes;c__Bacilli;Other;Other	vagina
Root;p__Firmicutes;c__Clostridia;o__Clostridiales;f__	gut
Root;p__Firmicutes;c__Clostridia;o__Clostridiales;f__Catabacteriaceae	gut
Root;p__Firmicutes;c__Clostridia;o__Clostridiales;f__Clostridiaceae	gut
Root;p__Firmicutes;c__Clostridia;o__Clostridiales;f__ClostridialesFamilyXI.IncertaeSedis	mouth/throat,skin/nose,vagina
Root;p__Firmicutes;c__Clostridia;o__Clostridiales;f__ClostridialesFamilyXIII.IncertaeSedis	mouth/throat
Root;p__Firmicutes;c__Clostridia;o__Clostridiales;f__Dehalobacteriaceae	gut
Root;p__Firmicutes;c__Clostridia;o__Clostridiales;f__Eubacteriaceae	mouth/throat
Root;p__Firmicutes;c__Clostridia;o__Clostridiales;f__Lachnospiraceae	gut,mouth/throat
Root;p__Firmicutes;c__Clostridia;o__Clostridiales;f__Peptococcaceae	mouth/throat
Root;p__Firmicutes;c__Clostridia;o__Clostridiales;f__Peptostreptococcaceae	mouth/throat
Root;p__Firmicutes;c__Clostridia;o__Clostridiales;f__Ruminococcaceae	gut
Root;p__Firmicutes;c__Clostridia;o__Clostridiales;f__Symbiobacteriaceae	NA
Root;p__Firmicutes;c__Clostridia;o__Clostridiales;f__Veillonellaceae	mouth/throat
Root;p__Firmicutes;c__Clostridia;o__Clostridiales;Other	gut
Root;p__Firmicutes;c__Clostridia;o__OPB54;f__	NA
Root;p__Firmicutes;c__Clostridia;Other;Other	NA
Root;p__Firmicutes;Other;Other;Other	gut
Root;p__Fusobacteria;c__Fusobacteria;o__Fusobacteriales;f__Fusobacteriaceae	mouth/throat
Root;p__Gemmatimonadetes;c__Gemmatimonadetes;o__Gemmatimonadales;f__	NA
Root;p__Gemmatimonadetes;c__Gemmatimonadetes;o__Gemmatimonadales;f__Gemmatimonadaceae	NA
Root;p__GN02;c__VC12-cl04;o__;f__	mouth/throat
Root;p__GN02;Other;Other;Other	NA
Root;p__Lentisphaerae;c__Lentisphaerae;o__Victivallales;f__Victivallaceae	gut
Root;p__Lentisphaerae;c__Lentisphaerae;o__Victivallales;Other	NA
Root;p__Nitrospirae;c__Nitrospira;o__Nitrospirales;f__Nitrospiraceae	NA
Root;p__Planctomycetes;c__Phycisphaerae;o__;f__	NA
Root;p__Planctomycetes;c__Phycisphaerae;o__Phycisphaerales;f__	NA
Root;p__Planctomycetes;c__Planctomycea;o__Gemmatales;f__Gemmataceae	NA
Root;p__Planctomycetes;c__Planctomycea;o__Gemmatales;f__Isosphaeraceae	NA
Root;p__Planctomycetes;c__Planctomycea;o__Pirellulales;f__	NA
Root;p__Planctomycetes;c__Planctomycea;o__Pirellulales;f__Pirellulaceae	NA
Root;p__Planctomycetes;c__Planctomycea;o__Pirellulales;Other	NA
Root;p__Planctomycetes;c__Planctomycea;o__Planctomycetales;f__Planctomycetaceae	NA
Root;p__Proteobacteria;c__Alphaproteobacteria;o__;f__	NA
Root;p__Proteobacteria;c__Alphaproteobacteria;o__Caulobacterales;f__Caulobacteraceae	NA
Root;p__Proteobacteria;c__Alphaproteobacteria;o__Rhizobiales;f__Bradyrhizobiaceae	NA
Root;p__Proteobacteria;c__Alphaproteobacteria;o__Rhizobiales;f__Brucellaceae	NA
Root;p__Proteobacteria;c__Alphaproteobacteria;o__Rhizobiales;f__Methylobacteriaceae	NA
Root;p__Proteobacteria;c__Alphaproteobacteria;o__Rhizobiales;f__Methylocystaceae	NA
Root;p__Proteobacteria;c__Alphaproteobacteria;o__Rhizobiales;Other	NA
Root;p__Proteobacteria;c__Alphaproteobacteria;o__Rhodobacterales;f__Rhodobacteraceae	NA
Root;p__Proteobacteria;c__Alphaproteobacteria;o__Rhodospirillales;f__Acetobacteraceae	NA
Root;p__Proteobacteria;c__Alphaproteobacteria;o__Rhodospirillales;f__Rhodospirillaceae	NA
Root;p__Proteobacteria;c__Alphaproteobacteria;o__Rickettsiales;f__	NA
Root;p__Proteobacteria;c__Alphaproteobacteria;o__Rickettsiales;f__Rickettsiaceae	NA
Root;p__Proteobacteria;c__Alphaproteobacteria;o__Sphingomonadales;f__Sphingomonadaceae	skin/nose
Root;p__Proteobacteria;c__Alphaproteobacteria;Other;Other	NA
Root;p__Proteobacteria;c__Betaproteobacteria;o__;f__	NA
Root;p__Proteobacteria;c__Betaproteobacteria;o__Burkholderiales;f__	skin/nose
Root;p__Proteobacteria;c__Betaproteobacteria;o__Burkholderiales;f__Alcaligenaceae	gut
Root;p__Proteobacteria;c__Betaproteobacteria;o__Burkholderiales;f__Burkholderiaceae	mouth/throat,skin/nose
Root;p__Proteobacteria;c__Betaproteobacteria;o__Burkholderiales;f__Comamonadaceae	skin/nose
Root;p__Proteobacteria;c__Betaproteobacteria;o__Burkholderiales;f__Oxalobacteraceae	vagina
Root;p__Proteobacteria;c__Betaproteobacteria;o__Burkholderiales;Other	mouth/throat
Root;p__Proteobacteria;c__Betaproteobacteria;o__Gallionellales;f__Gallionellaceae	NA
Root;p__Proteobacteria;c__Betaproteobacteria;o__Hydrogenophilales;f__Hydrogenophilaceae	NA
Root;p__Proteobacteria;c__Betaproteobacteria;o__Methylophilales;f__Methylophilaceae	NA
Root;p__Proteobacteria;c__Betaproteobacteria;o__Neisseriales;f__Neisseriaceae	mouth/throat,skin/nose
Root;p__Proteobacteria;c__Betaproteobacteria;o__Nitrosomonadales;f__Nitrosomonadaceae	NA
Root;p__Proteobacteria;c__Betaproteobacteria;o__Rhodocyclales;f__	NA
Root;p__Proteobacteria;c__Betaproteobacteria;o__Rhodocyclales;f__Rhodocyclaceae	NA
Root;p__Proteobacteria;c__Betaproteobacteria;Other;Other	gut,mouth/throat
Root;p__Proteobacteria;c__Deltaproteobacteria;o__Bdellovibrionales;f__Bdellovibrionaceae	NA
Root;p__Proteobacteria;c__Deltaproteobacteria;o__CTD005-82B-02;f__	NA
Root;p__Proteobacteria;c__Deltaproteobacteria;o__Desulfobacterales;f__Desulfobulbaceae	NA
Root;p__Proteobacteria;c__Deltaproteobacteria;o__Desulfovibrionales;f__Desulfovibrionaceae	gut
Root;p__Proteobacteria;c__Deltaproteobacteria;o__Desulfuromonadales;f__Geobacteraceae	NA
Root;p__Proteobacteria;c__Deltaproteobacteria;o__Desulfuromonadales;Other	NA
Root;p__Proteobacteria;c__Deltaproteobacteria;o__MIZ46;f__	NA
Root;p__Proteobacteria;c__Deltaproteobacteria;o__Myxococcales;f__	NA
Root;p__Proteobacteria;c__Deltaproteobacteria;o__Myxococcales;f__Cystobacteraceae	NA
Root;p__Proteobacteria;c__Deltaproteobacteria;o__Myxococcales;f__Haliangiaceae	NA
Root;p__Proteobacteria;c__Deltaproteobacteria;o__Myxococcales;f__Myxococcaceae	NA
Root;p__Proteobacteria;c__Deltaproteobacteria;o__Myxococcales;f__Polyangiaceae	NA
Root;p__Proteobacteria;c__Deltaproteobacteria;o__Myxococcales;Other	NA
Root;p__Proteobacteria;c__Deltaproteobacteria;o__Syntrophobacterales;f__Syntrophobacteraceae	NA
Root;p__Proteobacteria;c__Deltaproteobacteria;Other;Other	NA
Root;p__Proteobacteria;c__Epsilonproteobacteria;o__Campylobacterales;f__Campylobacteraceae	mouth/throat
Root;p__Proteobacteria;c__Epsilonproteobacteria;o__Campylobacterales;f__Helicobacteraceae	NA
Root;p__Proteobacteria;c__Epsilonproteobacteria;o__Campylobacterales;Other	NA
Root;p__Proteobacteria;c__Gammaproteobacteria;o__Aeromonadales;f__Aeromonadaceae	NA
Root;p__Proteobacteria;c__Gammaproteobacteria;o__Aeromonadales;f__Succinivibrionaceae	NA
Root;p__Proteobacteria;c__Gammaproteobacteria;o__Alteromonadales;f__Shewanellaceae	NA
Root;p__Proteobacteria;c__Gammaproteobacteria;o__Cardiobacteriales;f__Cardiobacteriaceae	mouth/throat
Root;p__Proteobacteria;c__Gammaproteobacteria;o__Chromatiales;f__	NA
Root;p__Proteobacteria;c__Gammaproteobacteria;o__Chromatiales;f__Ectothiorhodospiraceae	NA
Root;p__Proteobacteria;c__Gammaproteobacteria;o__Chromatiales;f__Sinobacteraceae	NA
Root;p__Proteobacteria;c__Gammaproteobacteria;o__Chromatiales;Other	NA
Root;p__Proteobacteria;c__Gammaproteobacteria;o__Enterobacteriales;f__Enterobacteriaceae	skin/nose
Root;p__Proteobacteria;c__Gammaproteobacteria;o__Legionellales;f__Coxiellaceae	NA
Root;p__Proteobacteria;c__Gammaproteobacteria;o__Legionellales;f__Legionellaceae	NA
Root;p__Proteobacteria;c__Gammaproteobacteria;o__Oceanospirillales;f__Alcanivoracaceae	NA
Root;p__Proteobacteria;c__Gammaproteobacteria;o__Oceanospirillales;f__Alteromonadaceae	NA
Root;p__Proteobacteria;c__Gammaproteobacteria;o__Oceanospirillales;f__Halomonadaceae	NA
Root;p__Proteobacteria;c__Gammaproteobacteria;o__Pasteurellales;f__Pasteurellaceae	mouth/throat
Root;p__Proteobacteria;c__Gammaproteobacteria;o__Pseudomonadales;f__Moraxellaceae	mouth/throat,skin/nose
Root;p__Proteobacteria;c__Gammaproteobacteria;o__Pseudomonadales;f__Pseudomonadaceae	skin/nose,vagina
Root;p__Proteobacteria;c__Gammaproteobacteria;o__Thiotrichales;f__	NA
Root;p__Proteobacteria;c__Gammaproteobacteria;o__Vibrionales;f__Vibrionaceae	NA
Root;p__Proteobacteria;c__Gammaproteobacteria;o__Xanthomonadales;f__Sinobacteraceae	NA
Root;p__Proteobacteria;c__Gammaproteobacteria;o__Xanthomonadales;f__Xanthomonadaceae	NA
Root;p__Proteobacteria;c__Gammaproteobacteria;Other;Other	NA
Root;p__Proteobacteria;Other;Other;Other	NA
Root;p__SC3;c__;o__;f__	NA
Root;p__SC4;c__;o__;f__	NA
Root;p__SPAM;c__0319-6G9;o__;f__	NA
Root;p__Spirochaetes;c__Leptospirae;o__Leptospirales;f__Leptospiraceae	NA
Root;p__Spirochaetes;c__Spirochaetes;o__Spirochaetales;f__Spirochaetaceae	mouth/throat
Root;p__Spirochaetes;Other;Other;Other	mouth/throat
Root;p__SR1;c__;o__;f__	mouth/throat
Root;p__Synergistetes;c__Synergistia;o__Synergistales;f__Dethiosulfovibrionaceae	mouth/throat
Root;p__Synergistetes;c__Synergistia;o__Synergistales;Other	NA
Root;p__Tenericutes;c__Erysipelotrichi;o__Erysipelotrichales;f__Erysipelotrichaceae	gut,mouth/throat
Root;p__Tenericutes;c__Erysipelotrichi;o__Erysipelotrichales;f__vadinHA31	NA
Root;p__Tenericutes;c__ML615J-28;o__;f__	gut
Root;p__Tenericutes;c__Mollicutes;o__Acholeplasmatales;f__Acholeplasmataceae	NA
Root;p__Tenericutes;c__Mollicutes;o__Anaeroplasmatales;f__Anaeroplasmataceae	NA
Root;p__Tenericutes;c__Mollicutes;o__Mycoplasmatales;f__Mycoplasmataceae	vagina
Root;p__Tenericutes;c__Mollicutes;o__RF39;f__	gut
Root;p__Tenericutes;c__Mollicutes;Other;Other	NA
Root;p__Tenericutes;Other;Other;Other	NA
Root;p__Thermi;c__Deinococci;o__Deinococcales;f__Deinococcaceae	skin/nose
Root;p__TM6;c__SJA-4;o__;f__	NA
Root;p__TM7;c__TM7-1;o__;f__	NA
Root;p__TM7;c__TM7-3;o__CW040;f__	mouth/throat
Root;p__TM7;c__TM7-3;o__CW040;f__F16	mouth/throat
Root;p__TM7;c__TM7-3;o__CW040;Other	NA
Root;p__TM7;c__TM7-3;o__EW055;f__	mouth/throat,skin/nose
Root;p__TM7;c__TM7-3;o__I025;f__Rs-045	mouth/throat
Root;p__TM7;c__TM7-3;Other;Other	mouth/throat
Root;p__TM7;Other;Other;Other	NA
Root;p__Verrucomicrobia;c__Opitutae;o__Opitutales;f__Opitutaceae	NA
Root;p__Verrucomicrobia;c__Opitutae;o__Puniceicoccales;f__Puniceicoccaceae	NA
Root;p__Verrucomicrobia;c__Opitutae;Other;Other	NA
Root;p__Verrucomicrobia;c__Spartobacteria;o__Spartobacteriales;f__Spartobacteriaceae	NA
Root;p__Verrucomicrobia;c__Verrucomicrobiae;o__Verrucomicrobiales;f__	NA
Root;p__Verrucomicrobia;c__Verrucomicrobiae;o__Verrucomicrobiales;f__Verrucomicrobiaceae	gut
Root;p__Verrucomicrobia;Other;Other;Other	NA
Root;p__WPS-2;c__;o__;f__	NA
